# Supplementary material for: Characterization of human αβTCR repertoire and discovery of D-D fusion in TCRβ chains
Source: PubMed Central journal article supplement (PMC4130922; doi:10.1007/s13238-014-0060-1), 2014-05-28
Supplement: 13238_2014_60_MOESM1_ESM.pdf [file 13238_2014_60_MOESM1_ESM.pdf]

# Supplementary Materials

Figure S1

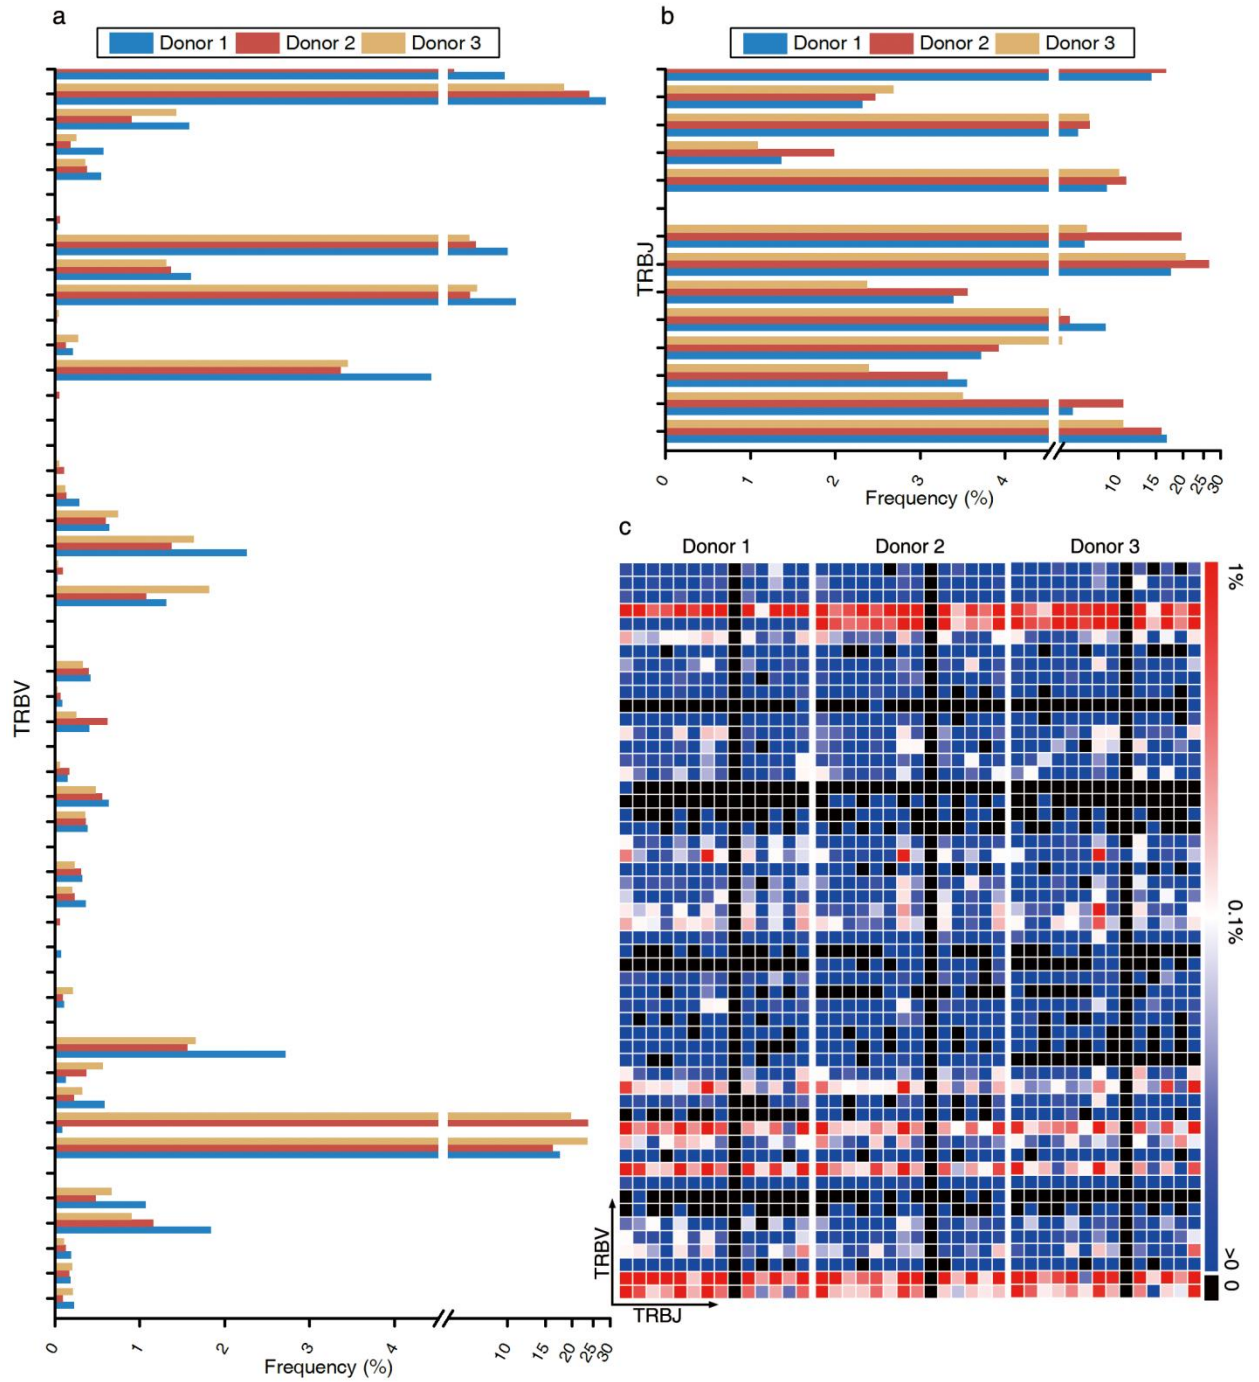

**Figure S1** Relative frequency of TRBV and TRBJ segments are listed in (a) and (b), respectively, according to their chromosome locations. (c) TRBV and TRBJ pairing

for three donors are shown; similarly, both V and J gene segments are listed in correlation with their chromosomal positions.

**Figure S2**

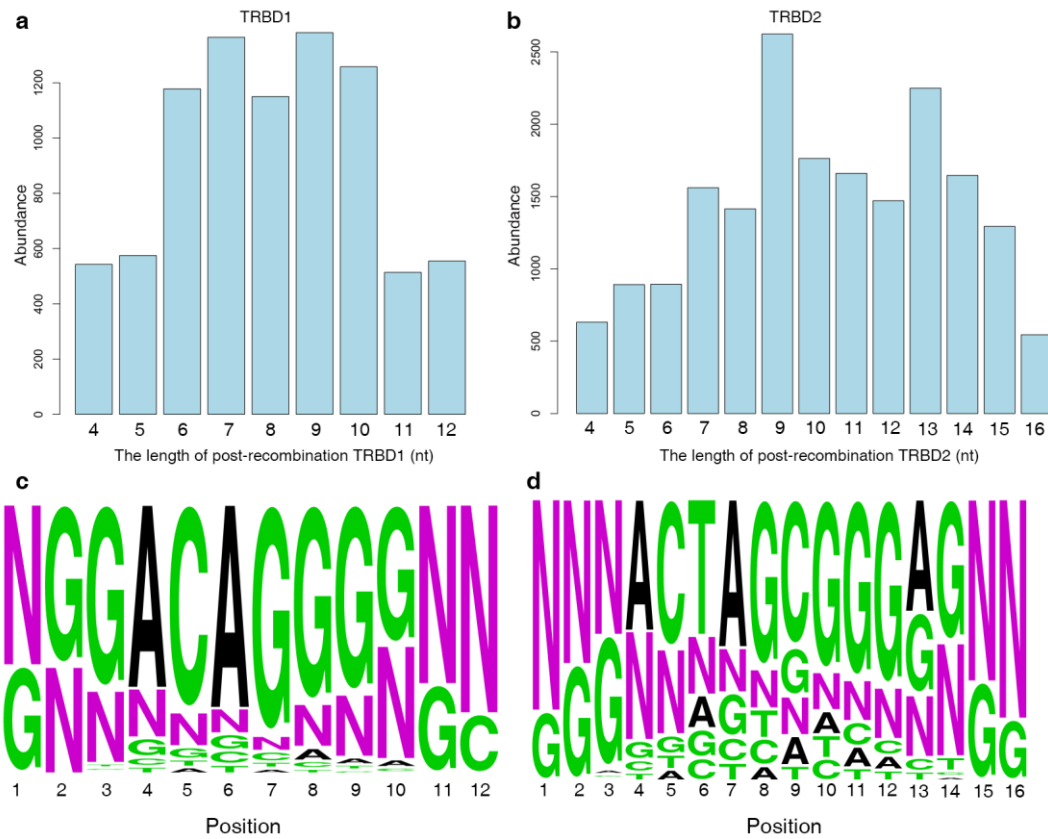

**Figure S2** Length distribution and nucleotides compositions of the post-recombination gene segments. TRBD1 (**a**) and TRBD2 (**b**) length distributions are illustrated as columns. Nucleotides compositions are represented using WebLogo for TRBD1 (**c**) and TRBD2 (**d**). N represents the frequency of nucleotides trimmed during somatic recombination.

**Table S1** Primers for 5'RACE

| Steps           | 5'primer                                                         | 3' primer                               |                              |
|-----------------|------------------------------------------------------------------|-----------------------------------------|------------------------------|
|                 |                                                                  | alpha chain                             | beta chain                   |
| RT <sup>a</sup> | ACAGCAGGTCAGTCAAGCAGT<br>AGCAGCAGTTCGATAAGCGGC<br>CGCCATGGAGGGHN | ACACATCAGAAT<br>CCTTACTTTG              | GTGGCCAG<br>GCACACCA<br>GTGT |
| 1st<br>PCR      | ACAGCAGGTCAGTCAAGCAGT<br>A                                       | GGTGAATAGGCA<br>GACAGACTT               | CATTCACC<br>CACCAGCT<br>CAG  |
| 2nd<br>PCR      | AGCAGTAGCAGCAGTTCGATA<br>A                                       | CACAGCGGCCGC<br>GCTGGTACACGG<br>CAGGGTC | TCTGATGG<br>CTCAAACA<br>CAGC |

<sup>a</sup>RT represents Reverse Transcription

**Table S2 TRAJ usage in TRDV1<sup>+</sup> TRA.**

|        | Donor 1 | Donor 2 | Donor 3 |
|--------|---------|---------|---------|
| TRAJ3  | 6       | 0*      | 0       |
| TRAJ4  | 1       | 2       | 5       |
| TRAJ5  | 1       | 0       | 0       |
| TRAJ6  | 2       | 0       | 5       |
| TRAJ7  | 2       | 0       | 2       |
| TRAJ8  | 1       | 1       | 1       |
| TRAJ9  | 2       | 3       | 0       |
| TRAJ10 | 0       | 0       | 1       |
| TRAJ11 | 0       | 1       | 0       |
| TRAJ12 | 0       | 0       | 2       |
| TRAJ13 | 0       | 20      | 5       |
| TRAJ15 | 3       | 1       | 1       |
| TRAJ16 | 0       | 0       | 6       |
| TRAJ17 | 0       | 1       | 5       |
| TRAJ18 | 4       | 1       | 14      |
| TRAJ20 | 1412    | 1023    | 766     |
| TRAJ21 | 20      | 7       | 16      |
| TRAJ22 | 3       | 6       | 1       |
| TRAJ23 | 1       | 1       | 6       |
| TRAJ24 | 1       | 0       | 0       |
| TRAJ26 | 4       | 2       | 0       |
| TRAJ27 | 3       | 0       | 3       |
| TRAJ28 | 0       | 7       | 4       |
| TRAJ29 | 0       | 2       | 0       |
| TRAJ30 | 5       | 4       | 3       |
| TRAJ31 | 5       | 0       | 1       |
| TRAJ32 | 0       | 0       | 1       |
| TRAJ33 | 0       | 3       | 3       |
| TRAJ34 | 3       | 0       | 2       |
| TRAJ36 | 5       | 6       | 1       |
| TRAJ37 | 10      | 5       | 1       |
| TRAJ38 | 1       | 1       | 1       |
| TRAJ39 | 2       | 4       | 8       |
| TRAJ40 | 2       | 5       | 1       |
| TRAJ41 | 3       | 14      | 7       |
| TRAJ42 | 2       | 7       | 7       |
| TRAJ43 | 8       | 9       | 4       |
| TRAJ44 | 1       | 2       | 3       |

|        |     |    |    |
|--------|-----|----|----|
| TRAJ45 | 6   | 13 | 1  |
| TRAJ46 | 0   | 0  | 0  |
| TRAJ47 | 0   | 82 | 1  |
| TRAJ48 | 1   | 30 | 3  |
| TRAJ49 | 45  | 28 | 17 |
| TRAJ50 | 1   | 3  | 0  |
| TRAJ52 | 7   | 5  | 5  |
| TRAJ53 | 7   | 2  | 6  |
| TRAJ54 | 1   | 0  | 5  |
| TRAJ56 | 1   | 0  | 1  |
| TRAJ57 | 171 | 3  | 0  |

\*Zero represents the corresponding TRDV1-TRAJ pair is not detected.

1. Freeman JD, Warren RL, Webb JR, Nelson BH, Holt RA. Profiling the T-cell receptor beta-chain repertoire by massively parallel sequencing. *Genome Res* 2009, 19(10): 1817-1824.
2. Warren RL, Freeman JD, Zeng T, Choe G, Munro S, Moore R, et al. Exhaustive T-cell repertoire sequencing of human peripheral blood samples reveals signatures of antigen selection and a directly measured repertoire size of at least 1 million clonotypes. *Genome Res* 2011, **21**(5): 790-797.
